# Supplementary material for: An in vivo MAIT cell activation and rejuvenation system for liver cancer therapy
Source: Research Square preprint supplement (doi:10.21203/rs.3.rs-8518619/v1), 2026-01-16
Supplement: Supplementary file 1 [file 6b8819924cf3267de3ff354e.docx]

**Supplementary Information**

**An *in vivo* MAIT cell activation and rejuvenation system**

**for liver cancer therapy**

Yan-Ruide Li1,2,*,§, Haochen Nan2,*, Zhengyao Shao3,*, Xinyuan Shen1,2,*, Yuning Chen1,2, Yichen Zhu1,2, Jie Huang1,2, Shelby Yeh1,2, Thomas Yuen1,2, Shreya Gumate4,5, Vatche G. Agopian4,5, Song Li2,§, Lili Yang1,2,6,7,8,9,10,§

**Author Affiliation:**

1Department of Microbiology, Immunology & Molecular Genetics, University of California, Los Angeles, Los Angeles, CA 90095, USA

2Department of Bioengineering, University of California, Los Angeles, Los Angeles, CA 90095, USA

3Department of Pharmacology, University of California, San Diego, La Jolla, CA 90023, USA

4Department of Surgery, David Geffen School of Medicine, University of California, Los Angeles, Los Angeles, CA 90095, USA

5Dumont-UCLA Liver Cancer Center, University of California, Los Angeles, Los Angeles, CA 90095, USA

6Jonsson Comprehensive Cancer Center, David Geffen School of Medicine, University of California, Los Angeles, Los Angeles, CA 90095, USA

7Eli and Edythe Broad Center of Regenerative Medicine and Stem Cell Research, University of California, Los Angeles, Los Angeles, CA 90095, USA

8Molecular Biology Institute, University of California, Los Angeles, CA 90095, USA

9Parker Institute for Cancer Immunotherapy, University of California, Los Angeles, Los Angeles, CA 90095, USA

10Goodman-Luskin Microbiome Center, University of California, Los Angeles, Los Angeles, CA 90095, USA

*These authors contributed equally.

§Corresponding author. Email: [liliyang@ucla.edu](mailto:liliyang@ucla.edu) (L.Y.), [songli@ucla.edu](mailto:songli@ucla.edu) (S.L.), and [charlie.li@ucla.edu](mailto:charlie.li@ucla.edu) (Y.-R.L.)





**Supplementary Fig. 1 Single-cell transcriptomic profiling of MAIT cells in primary liver tumors.**

**a** Table displaying information about the primary liver cancer samples (LC) and normal adjacent liver sample (NA) used in the scRNA-seq analyses conducted in Fig. 1.

**b** UMAP plots showing the gene expression distribution of the indicated T cell lineage markers, that were used to define MAIT, CD4 T, and CD8 T cell clusters.

**c** Violin plots showing the expression levels of the effector, memory, cytotoxic, early exhausted, and terminal exhausted gene signatures in the indicated samples.





**Supplementary Fig. 2 MAIT cells exhibit enhanced effector and memory characteristics compared with conventional T cells following MARS activation.**

FACS analyses showing the expression of the indicated surface markers on MAIT cells or conventional T cells following MARS activation (n = 4).

Representative of 3 experiments. Data are presented as the mean ± SEM. *p < 0.05, ***p < 0.001, ****p < 0.0001, by Student’s *t* test.

**

**

**Supplementary Fig. 3 MARS induces MAIT cell activation via MAIT TCR engagement and IL-15-dependent signaling.**

Western blot analyses of key molecules involved in IL-15-dependent signaling in MAIT cells following stimulation by different methods (n = 4). Data are related to main Fig. 3**o**.

Representative of 3 experiments. Data are presented as the mean ± SEM. ns, not significant, *p < 0.05, **p < 0.01, ***p < 0.001, ****p < 0.0001, by Student’s *t* test (p-JAK1 and p-JAK3) or one-way ANOVA (Others).





**Supplementary Fig. 4 MARS enhances MAIT cell effector function against liver cancer *in vivo*.**

FACS analyses of the expression of effector (i.e., CD69) and exhaustion marker (i.e., LAG-3 and TIM-3) expression on MAIT cells in mouse livers collected from the indicated groups at day 30. Data are related to main Fig. 5**i**.

Representative of 3 experiments. Data are presented as the mean ± SEM. ns, not significant, **p < 0.01, ***p < 0.001, ****p < 0.0001, by one-way ANOVA.

**Supplementary Table 1. Clinical liver cancer patient sample information**

| **Patient ID** | **Diagnosis** | **Treatment**  **status** | **Specimen type** |
| --- | --- | --- | --- |
| #1 | Primary liver HCC | Tx naive | Liver cancer samples (LC), normal adjacent liver samples (NA), and peripheral blood samples |
| #2 | Metastatic HCC to abdominal wall | Tx naive |
| #3 | Primary liver HCC | Tx naive |
| #4 | Primary liver HCC, MASH | Tx naive |
| #5 | Primary liver HCC, chronic hepatitis B | Treated |
| #6 | Primary liver HCC | Tx naive | Peripheral blood samples |
| #7 | Primary liver HCC, MASH, cirrhosis | Tx naive |
| #8 | Primary liver HCC, HCV cirrhosis | Tx naive |
| #9 | Primary liver HCC, MASH | Tx naive |
| #10 | Primary liver HCC, MASH cirrhosis | Tx naive |
| #11 | Primary liver HCC | Treated |
| #12 | Primary liver HCC | Treated |
| #13 | Primary liver HCC | Treated |
| #14 | Primary liver HCC | Treated |
| #15 | Primary liver HCC, cirrhosis | Treated |

**Abbreviations**: HCC, hepatocellular carcinoma; MASH, metabolic dysfunction–associated steatohepatitis; HCV, hepatitis C virus; Tx naive, treatment naïve.
